# Supplementary material
Source: PubMed Central journal article supplement (PMC3637415)

**A**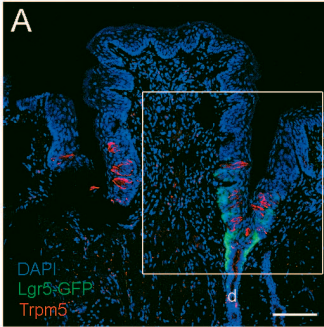**B**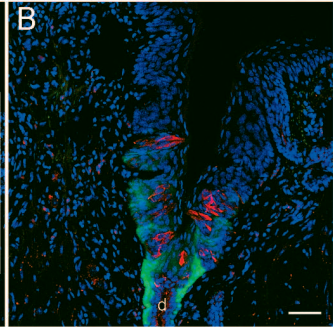

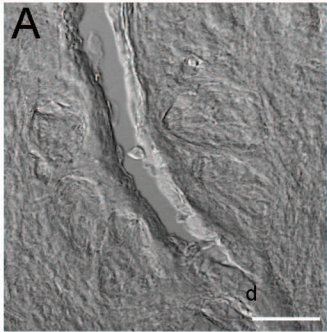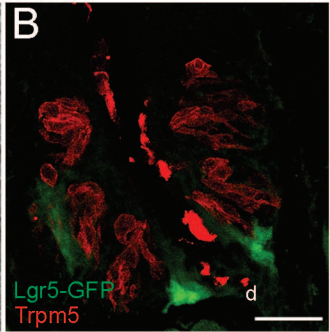

5-day injections: 6 months later

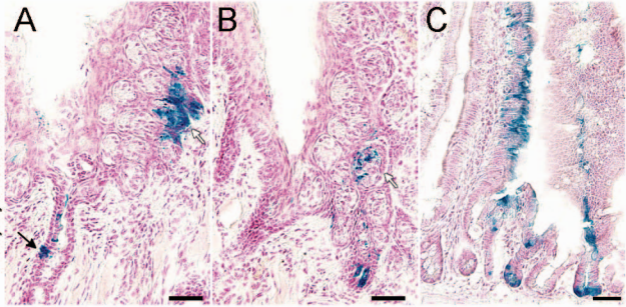

1 day injection: 1 day later

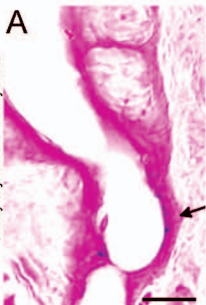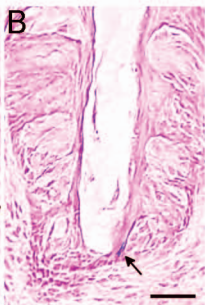

1 day injection: 2 weeks later

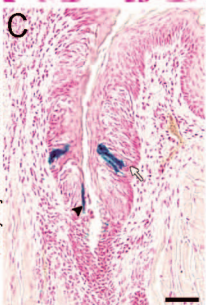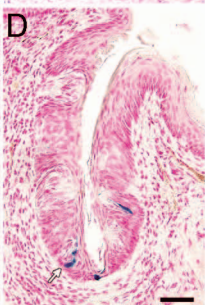

1 day injection: 1 month later

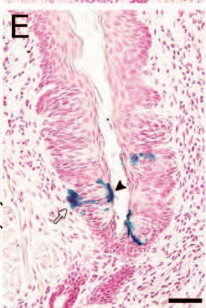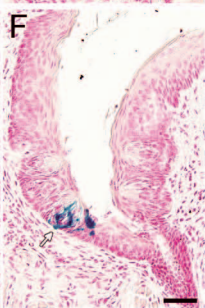

1-day injection: 1 month later

**A**

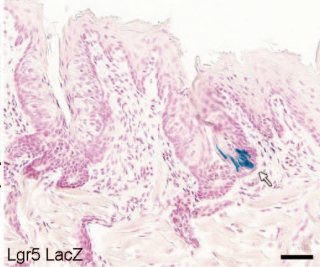

**B**

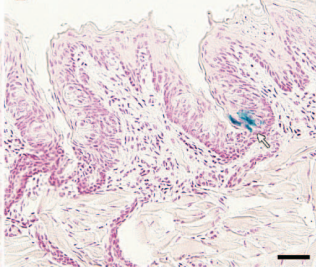

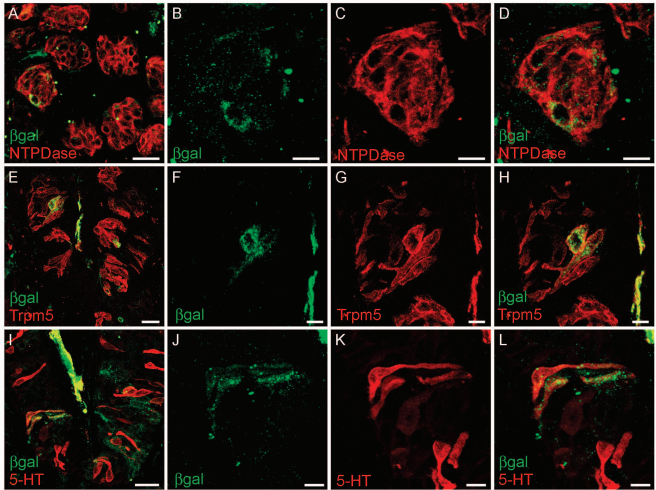

**A**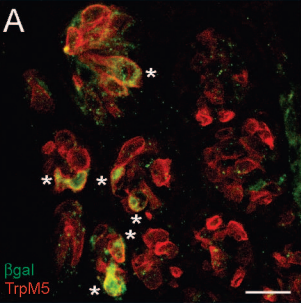**B**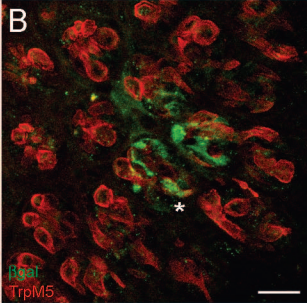

Supplement: NIHMS439935-supplement-Supp_Fig_S1-S7.pdf [file NIHMS439935-supplement-Supp_Fig_S1-S7.pdf]
